# Supplementary material for: Global trends in extreme precipitation: climate models vs. observations
Source: Copernicus journal article supplement (doi:10.5194/hessd-11-11369-2014), 2014-10-15
Supplement: Supplementary file 1 [file supplement-cover-letter.pdf › supplement-cover-letter.pdf]

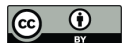

## *Supplement of*

# **Global trends in extreme precipitation: climate models vs. observations**

**B. Asadieh and N. Y. Krakauer**

*Correspondence to:* B. Asadieh (basadie00@citymail.cuny.edu)

- Supplement-Cover-Letter.pdf
- Supplementary Figures
  - figS01.png
  - figS02.png
  - figS03.png
  - figS04.png
  - figS05.png
  - figS06.png
  - figS07.png
  - figS08.png
